# Supplementary material for: Exercise-Based Interventions in Hemodialysis Patients: A Systematic Review with a Meta-Analysis of Randomized Controlled Trials
Source: MDPI journal article supplement (doi:10.3390/jcm9010043), 2019-12-24
Supplement: s1 [file s1]

**Supplementary Table S1** Detailed characteristics of included studies selected for meta-analysis and relevant outcomes

| Study                             | Population                              |                                 | Training variables |                                                                                                                                                                                                                                                                                                                                                                                                              | Outcome measures    | Results                                                                                                       |
|-----------------------------------|-----------------------------------------|---------------------------------|--------------------|--------------------------------------------------------------------------------------------------------------------------------------------------------------------------------------------------------------------------------------------------------------------------------------------------------------------------------------------------------------------------------------------------------------|---------------------|---------------------------------------------------------------------------------------------------------------|
|                                   | Sex;<br>Age (years)<br>[mean ± SD]      | Time on<br>dialysis<br>(months) | Sample size        | Training program                                                                                                                                                                                                                                                                                                                                                                                             | Outcome<br>measure  |                                                                                                               |
| Deligiannis<br>1999 <sup>37</sup> | M and F;                                | Ex<br>75.6 ± 36.0               | Ex (n = 30)        | Ex: non-dialysis days;<br>10-minute warm-up<br>(bicycling and/or<br>walking);<br>a 50-minute aerobic<br>exercise program<br>(calisthenics, steps,<br>swimming, or ball<br>games);<br>a 20-minute stretching<br>and low-weight<br>resistance program;<br>a 10- minute cool-<br>down period<br>(bicycling and/or<br>walking);<br>6 months;<br>3 days/week;<br>90 min;<br>60 – 70% HRmax<br><br>Con: usual care | VO <sub>2</sub> max | Ex: 41.0 % ↑*<br>Con: no changes                                                                              |
|                                   | Ex<br>48 ± 12<br>Con<br>48 ± 11         | Con<br>74.4 ± 43.2              | Con (n = 30)       |                                                                                                                                                                                                                                                                                                                                                                                                              |                     |                                                                                                               |
| Afshar 2011 <sup>60</sup>         | M;                                      | Ex<br>25.71 ± 7.61              | Ex (n = 14)        | Ex: cycling during<br>HD;<br>8 weeks;<br>3 days/week;<br>20 min;<br>12 - 15 RPE<br><br>Con: usual care                                                                                                                                                                                                                                                                                                       | CRP                 | Ex: 83.2 % ↓**<br>Con: 1.2 % ↑                                                                                |
|                                   | Ex<br>50.71 ± 21.06<br>Con<br>53 ± 19.4 | Con<br>24.86 ± 15.44            | Con (n = 14)       |                                                                                                                                                                                                                                                                                                                                                                                                              |                     |                                                                                                               |
| Wu 2014 <sup>26</sup>             | M and F;                                | Ex<br>55.5 ± 37.3               | Ex (n = 34)        | Ex: cycling during<br>HD;<br>12 weeks;<br>3 days/week;<br>15 min;<br>12 – 16 RPE<br><br>Con: simple<br>stretching exercises;<br>12 weeks;<br>3 days/week;<br>10–15 min                                                                                                                                                                                                                                       | 6MWT                | Ex: 8.09 % ↓*<br>Con: 4.77 % ↓                                                                                |
|                                   | Ex<br>45<br>Con<br>44                   | Con<br>39.8 ± 29.7              | Con (n = 35)       |                                                                                                                                                                                                                                                                                                                                                                                                              | STS-10              | Ex: 5.7 % ↓*<br>Con: 5.0 % ↓                                                                                  |
| Bohm 2014 <sup>27</sup>           | M and F;                                | Ex<br>37 ± 69                   | Ex (n = 27)        | Ex: cycling during<br>HD;<br>12 weeks;<br>3 days/week;<br>45 min;<br>13 RPE<br><br>Con: walking<br>program at home                                                                                                                                                                                                                                                                                           | peakVO <sub>2</sub> | Ex:<br>after 12 weeks:<br>9.89 % ↑<br>after 24 weeks:<br>no change<br><br>Con:<br>after 12 weeks:<br>3.31 % ↓ |
|                                   | Ex<br>52 ± 14.5<br>Con<br>53 ± 16.9     | Con<br>21 ± 30                  | Con (n = 26)       |                                                                                                                                                                                                                                                                                                                                                                                                              |                     |                                                                                                               |

|                                 |                                                           |                                           |                                 |                                                                                                                                                                                             |                                 |                                                                                                                                                                                |
|---------------------------------|-----------------------------------------------------------|-------------------------------------------|---------------------------------|---------------------------------------------------------------------------------------------------------------------------------------------------------------------------------------------|---------------------------------|--------------------------------------------------------------------------------------------------------------------------------------------------------------------------------|
|                                 |                                                           |                                           |                                 |                                                                                                                                                                                             | 6MWT                            | after 24 weeks:<br>1.66 % ↑<br><br>Ex:<br>after 12 weeks:<br>6.58 % ↑<br>after 24 weeks:<br>3.96 % ↑<br><br>Con:<br>after 12 weeks:<br>1.67 % ↑<br>after 24 weeks:<br>0.05 % ↓ |
| Groussard<br>2015 <sup>28</sup> | M and F;<br><br>Ex<br>66.5 ± 4.6<br>Con<br>68.4 ± 3.7     | Ex<br>36.6 ± 8.2<br><br>Con<br>41.2 ± 8.1 | Ex (n = 8)<br><br>Con (n = 10)  | Ex: cycling during<br>HD;<br>3 months;<br>3 days/week;<br>30 min;<br>55%–60% peak power<br><br>Con: usual care                                                                              | 6MWT<br><br>peakVO <sub>2</sub> | Ex: 23.15 % ↑**<br>Con: 7.98 % ↑<br><br>Ex: 2.72 % ↓<br>Con: 14.18 % ↑                                                                                                         |
| Hristea<br>2016 <sup>61</sup>   | M and F;<br><br>Ex<br>68.5 ± 13.97<br>Con<br>70.8 ± 15.18 | Ex<br>139<br><br>Con<br>96                | Ex (n = 10)<br><br>Con (n = 11) | Ex: cycling during<br>HD;<br>6 months;<br>3 days/week;<br>30 min;<br>3 RPE (modified Borg<br>scale)<br><br>Con: usual care                                                                  | 6MWT<br><br>CRP                 | Ex: 21.8 % ↑**<br>Con: 18.8 % ↓<br><br>Ex: 30.6 % ↓**<br>Con: 19.8 % ↓                                                                                                         |
| Liao 2016 <sup>29</sup>         | M and F;<br><br>Ex<br>62 ± 8<br>Con<br>62 ± 9             | Ex<br>71 ± 46<br><br>Con<br>83 ± 71       | Ex (n = 20)<br><br>Con (n = 20) | Ex: cycling during<br>HD;<br>3 months;<br>3 days/week;<br>20 min;<br>13-14 RPE<br><br>Con: usual care                                                                                       | CRP<br><br>6MWT                 | Ex: 37.6 % ↓*<br>Con: 0.81 % ↓<br><br>Ex: 11.1 % ↑*<br>Con: 1.1 % ↓                                                                                                            |
| Cheema<br>2007 <sup>30</sup>    | M and F;<br><br>Ex<br>60.0 ± 15.3<br>Con<br>65.0 ± 12.9   | Ex<br>39.6<br><br>Con<br>19.2             | Ex (n = 24)<br><br>Con (n = 25) | Ex: progressive<br>resistance training;<br>two sets of eight<br>repetitions of 10<br>exercises;<br>during HD;<br>12 weeks;<br>3 days/week;<br>45 min;<br>15 – 17 RPE<br><br>Con: usual care | 6MWT<br><br>CRP                 | Ex: 3.36 % ↑<br>Con: 0.74 % ↓<br><br>Ex: 10.26 % ↓*<br>Con: 33.33 % ↑*                                                                                                         |
| Kirkman<br>2014 <sup>31</sup>   | M and F;<br><br>Ex<br>48 ± 18<br>Con<br>58 ± 15           | Ex<br>46 ± 54<br><br>Con<br>66 ± 47       | Ex (n = 9)<br><br>Con (n = 10)  | Ex: progressive<br>resistance training<br>during HD;<br>12 weeks;<br>3 days/week;                                                                                                           | 6MWT                            | Ex: 7.33 % ↑<br>Con: 13.04 % ↑                                                                                                                                                 |

80 % of their  
predicted 1RM

Con: stretching  
during HD

|                                       |                                                                                                                     |                                                                                      |                                                                                          |                                                                                                                                                                                                                                                                                                                                                                                       |         |                                                                                        |
|---------------------------------------|---------------------------------------------------------------------------------------------------------------------|--------------------------------------------------------------------------------------|------------------------------------------------------------------------------------------|---------------------------------------------------------------------------------------------------------------------------------------------------------------------------------------------------------------------------------------------------------------------------------------------------------------------------------------------------------------------------------------|---------|----------------------------------------------------------------------------------------|
| Kouidi<br>1997 <sup>48</sup>          | M and F;<br><br>Ex<br>49.6 ± 12.1<br>Con<br>52.8 ± 10.2                                                             | Ex<br>70.8 ± 58.8<br><br>Con<br>74.4 ± 64.8                                          | Ex (n = 20)<br><br>Con (n = 11)                                                          | Ex: stationary cycling,<br>walking or jogging,<br>calisthenics, aerobics,<br>swimming and/or<br>game sports<br>(basketball, football);<br>non-dialysis days;<br>6 months;<br>3 days/week;<br>90 min;<br>50-60 % VO2max<br><br>Con: usual care                                                                                                                                         | VO2max  | Ex: 38.09 % ↑*<br>Con: 1.24 % ↓                                                        |
| Painter<br>2002 <sup>62</sup>         | M and F;<br><br>Ex<br>55.9 ± 15.15<br>Con<br>52.8 ± 16.8                                                            | Ex<br>33.7 ± 35.6<br><br>Con<br>40.2 ± 62.4                                          |                                                                                          | Ex: cycling during<br>HD;<br>5 months;<br>3 days/week;<br>30 min;<br>12 – 14 RPE<br><br>Con: usual care                                                                                                                                                                                                                                                                               | peakVO2 | Ex: 13.3 % ↑*<br>Con: 0.5 % ↑                                                          |
| DePaul<br>2002 <sup>32</sup>          | M and F;<br><br>Ex<br>55 ± 16<br>Con<br>54 ± 14                                                                     | Ex<br>50.4 ± 57.6<br><br>Con<br>55.2 ± 54.0                                          | Ex (n = 20)<br><br>Con (n = 18)                                                          | Ex: cycling during HD<br>+ strength training for<br>hamstrings and<br>quadriceps muscle<br>groups before or after<br>HD;<br>12 weeks;<br>3 days/week;<br>30 min;<br>13 RPE<br><br>Con: non-progressive,<br>non-resisted, low-<br>intensity range-of-<br>motion exercises of<br>the lower extremities<br>and free upper<br>extremity during HD;<br>12 weeks;<br>3 days/week;<br>30 min | 6MWT    | Ex: 0.87 % ↑<br>Con: 0.94 % ↑                                                          |
| Konstantinid<br>ou 2002 <sup>44</sup> | M and F;<br><br>group A<br>46.4 ± 13.9<br>group B<br>48.3 ± 12.1<br>group C<br>51.4 ± 12.5<br>group D<br>50.2 ± 7.9 | group A<br>78 ± 62<br>group B<br>72 ± 66<br>group C<br>62 ± 37<br>group D<br>79 ± 86 | group A<br>(n = 16)<br>group B<br>(n = 10)<br>group C<br>(n = 10)<br>group D<br>(n = 12) | group A:<br>guided exercise<br>program;<br>non-dialysis days;<br>6 months;<br>3 days/week;<br>60 min;<br>60–70% HRmax<br><br>group B:<br>during HD                                                                                                                                                                                                                                    | peakVO2 | group A: 42.77 % ↑*<br>group B: 23.93 % ↑*<br>group C: 17.28 % ↑*<br>group D: 3.07 % ↓ |

30 min cycling + 30 min exercises for strength and flexibility  
6 months;  
3 days/week;  
70% HRmax

group C:  
home-based program of 30 min cycling + simple flexibility and muscular extension exercises  
6 months;  
5 days/week;  
50–60% HRmax

group D:  
usual care

|                                  |                                                                                                                  |                                                                                                  |                                                                              |                                                                                                                                                                                                                                                                                                                                                                                                                                           |                                   |                                                                                      |
|----------------------------------|------------------------------------------------------------------------------------------------------------------|--------------------------------------------------------------------------------------------------|------------------------------------------------------------------------------|-------------------------------------------------------------------------------------------------------------------------------------------------------------------------------------------------------------------------------------------------------------------------------------------------------------------------------------------------------------------------------------------------------------------------------------------|-----------------------------------|--------------------------------------------------------------------------------------|
| van Vilsteren 2005 <sup>34</sup> | M and F;<br><br>Ex<br>52 ± 15<br>Con<br>58 ± 16                                                                  | Ex<br>38.6 ± 48.9<br><br>Con<br>46.8 ± 52.9                                                      | Ex (n = 53)<br><br>Con (n = 43)                                              | Ex: pre-dialysis strength training programme + cycling (during HD) and exercise counselling<br>12 weeks;<br>2-3 days/week<br>mean duration:<br>strength training:<br>16.78 min<br>cycling:<br>49.86 min<br>12 – 16 RPE<br><br>Con: usual care                                                                                                                                                                                             | STS-10<br><br>peakVO <sub>2</sub> | Ex: 22.36 % ↓*<br>Con: 0.25 % ↓<br><br>Ex: 10.14 % ↑<br>Con: 0.46 % ↑                |
| Kopple 2007 <sup>63</sup>        | M and F;<br><br>group 1<br>45.9 ± 4.1<br>group 2<br>46.0 ± 2.7<br>group 3<br>42.7 ± 3.8<br>group 4<br>41.3 ± 3.3 | group 1<br>45.9 ± 14.1<br>group 2<br>51.9 ± 12.4<br>group 3<br>38.3 ± 5.8 group 4<br>51.4 ± 21.0 | group 1 (n = 10)<br>group 2 (n = 15)<br>group 3 (n = 12)<br>group 4 (n = 14) | Group 1: cycling during HD;<br>5 months:<br>3 days/week;<br>30 min;<br>50% peakVO <sub>2</sub><br><br>Group 2: strength training; before HD;<br>5 months:<br>3 days/week;<br>75% of the 5-RM<br><br>Group 3: endurance + strength training; a combination of approximately one half of the group 1 work effort and also one half of the group 2 work effort; before and during HD;<br>5 months:<br>3 days/week<br><br>Group 4: usual care | CRP                               | group 1: 44.44 % ↓<br>group 2: 20.00 % ↑<br>group 3: 26.09 % ↑<br>group 4: 33.33 % ↑ |

|                            |                                                                                            |                                                                                 |                                                          |                                                                                                                                                                                                                                            |                     |                                                                  |
|----------------------------|--------------------------------------------------------------------------------------------|---------------------------------------------------------------------------------|----------------------------------------------------------|--------------------------------------------------------------------------------------------------------------------------------------------------------------------------------------------------------------------------------------------|---------------------|------------------------------------------------------------------|
| Kouidi 2009 <sup>38</sup>  | M and F;<br><br>Ex<br>54.6 ± 8.9<br>Con<br>53.2 ± 6.1                                      | Ex<br>75.6 ± 44.4<br><br>Con<br>74.4 ± 46.8                                     | Ex (n = 30)<br><br>Con (n = 29)                          | Ex: cycling + strength training during HD; 10 months; 3 days/week; 90 min; 13 RPE<br><br>Con: usual care                                                                                                                                   | peakVO2             | Ex: 30.49 % ↑**<br>Con: 1.19 % ↓                                 |
| Koh 2010 <sup>52</sup>     | M and F;<br><br>group 1<br>52.3 ± 10.9<br>group 2<br>52.1 ± 13.6<br>group 3<br>51.3 ± 14.4 | group 1<br>32.1 ± 26.7<br>group 2<br>37.0 ± 31.1<br>group 3<br>25.8 ± 22.2      | group 1 (n = 15)<br>group 2 (n = 15)<br>group 3 (n = 16) | group 1: cycling during HD; 6 months; 3 days/week; 30 min; 13-14 RPE<br><br>group 2: walking at home; 6 months; 3 days/week; 30 min; 13-14 RPE<br><br>group 3: usual care                                                                  | 6MWT                | group 1: 13.61 % ↑<br>group 2: 11.04 % ↑<br>group 3: 4.87 % ↑    |
| Afshar 2010 <sup>64</sup>  | M;<br>group 1<br>50.7 ± 21.06<br>group 2<br>51 ± 16.4<br>group 3<br>53 ± 19.4              | group 1<br>25.71 ± 7.61<br>group 2<br>24.86 ± 18.69<br>group 3<br>24.86 ± 15.44 | group 1 (n = 7)<br>group 2 (n = 7)<br>group 3 (n = 7)    | group 1: cycling during HD; 8 weeks; 3 days/week; 30 min; 12-16 RPE<br><br>group 2: resistance training (ankle weights for knee extension, hip abduction, and flexion); 8 weeks; 3 days/week; 30 min; 15-17 RPE<br><br>group 3: usual care | CRP                 | group 1: 83.85 % ↓**<br>group 2: 67.89 % ↓*<br>group 3: 1.47 % ↑ |
| Ouzouni 2009 <sup>39</sup> | M and F;<br><br>Ex<br>47.4 ± 15.7<br>Con<br>50.5 ± 11.7                                    | Ex<br>92.4 ± 84<br><br>Con<br>103.2 ± 72                                        | Ex (n = 19)<br><br>Con (n = 14)                          | Ex: cycling + strength training during HD; 10 months; 3 days/week; 60-90 min 13-14 RPE<br><br>Con: usual care                                                                                                                              | peakVO <sub>2</sub> | Ex: 21.05 % ↑*<br>Con: 0.99 % ↓                                  |
| Orcy 2012 <sup>65</sup>    | M and F;<br><br>group 1<br>56.9 ± 14.8<br>group 2<br>55.8 ± 18.3                           | group 1<br>22.5<br><br>group 2<br>23                                            | group 1 (n = 13)<br><br>group 2 (n = 13)                 | group 1: 20 min of cycling during HD; 10 min of resistance training during HD; 10 weeks; 3 days/week; 13-14 RPE                                                                                                                            | 6MWT                | group 1: 9.01 % ↑*<br>group 2: 4.48 % ↓                          |

|                                |                                                                                           |                                                          |                                                          | group 2: 30 min of resistance training during HD; 10 weeks; 3 days/week; 13-14 RPE                                                                                                                                                                                                                                                                                                                 |                     |                                                                |
|--------------------------------|-------------------------------------------------------------------------------------------|----------------------------------------------------------|----------------------------------------------------------|----------------------------------------------------------------------------------------------------------------------------------------------------------------------------------------------------------------------------------------------------------------------------------------------------------------------------------------------------------------------------------------------------|---------------------|----------------------------------------------------------------|
| Tao 2015 <sup>41</sup>         | M and F;<br><br>Ex<br>53.02 ± 11.62<br>Con<br>56.68 ± 9.67                                | Ex<br>83.46 ± 61.37<br><br>Con<br>84.70 ± 70.55          | Ex (n = 57)<br><br>Con (n = 56)                          | Ex: flexibility and strength exercise before HD; 6 weeks; 1 day/week; 20 min; RPE 12-13 + nurse case management on home exercise; 1 day/week; 20 min<br><br>Con: flexibility and strength exercise before HD; 6 weeks; 1 day/week; 20 min; RPE 12-13                                                                                                                                               | STS-10              | Ex: 21.03 % ↓**<br>Con: 16.24 % ↓*                             |
| Carmack 1995 <sup>66</sup>     | M and F;<br><br>All subjects<br>44.09                                                     | All subjects<br>29.52                                    | Ex (n = 10)<br><br>Con (n = 11)                          | Ex: cycling during HD; 10 weeks; 3 days/week; 25 min<br><br>Con: usual care                                                                                                                                                                                                                                                                                                                        | peakVO <sub>2</sub> | Ex: 34.58 % ↑*<br>Con: 9.0 % ↑                                 |
| Deligiannis 1999 <sup>37</sup> | M and F;<br><br>group 1<br>46.4 ± 13.9<br>group 2<br>51.4 ± 12.5<br>group 3<br>50.2 ± 1.9 | group 1<br>78±62<br>group 2<br>62±37<br>group 3<br>79±86 | group 1 (n = 16)<br>group 2 (n = 10)<br>group 3 (n = 12) | group 1: 10-min warm-up on a cycle ergometer or treadmill, a 50-min intermittent aerobic exercise program, including calisthenics, steps and flexibility exercises and a 10-min cooldown period; non-dialysis days; 6 months; 3 days/week; 90 min; 60-70% HRmax<br><br>group 2: cycling at home; 6 months; 5 days/week; 30 min; 50-60% HRmax + simple flexibility and muscular extension exercises | VO <sub>2</sub> max | group 1: 42.8 % ↑**<br>group 2: 17.3 % ↑*<br>group 3: 3.07 % ↓ |

|                                   |                                                                  |                                                      |                                                |                                                                                                                                                                                                                                                                                                                                                                       |                     |                                                                                            |
|-----------------------------------|------------------------------------------------------------------|------------------------------------------------------|------------------------------------------------|-----------------------------------------------------------------------------------------------------------------------------------------------------------------------------------------------------------------------------------------------------------------------------------------------------------------------------------------------------------------------|---------------------|--------------------------------------------------------------------------------------------|
|                                   |                                                                  |                                                      |                                                | group 3:<br>usual care                                                                                                                                                                                                                                                                                                                                                |                     |                                                                                            |
| Tsuyuki<br>2003 <sup>67</sup>     | M and F;<br><br>Ex<br>40.1 ± 11.9<br>Con<br>39.7 ± 10.7          | Ex<br>25.2<br><br>Con<br>32.4                        | Ex<br>(n = 17)<br><br>Con<br>(n = 12)          | Ex: combination<br>training of stationary<br>cycling, walking and<br>jogging;<br>non-dialysis days;<br>20 weeks;<br>2-3 days/week;<br>30 min;<br>50-60% of the peak<br>heart rate<br><br>Con: usual care                                                                                                                                                              | peakVO <sub>2</sub> | Ex: 25.58 % ↑**<br>Con: 2.25 % ↓                                                           |
| Segura-Ortí<br>2009 <sup>46</sup> | M and F;<br><br>group 1<br>53.5 ± 18.0<br>group 2<br>60.1 ± 16.9 | group 1<br>37.3 ± 34.9<br><br>group 2<br>53.7 ± 42.0 | group 1<br>(n = 17)<br><br>group 2<br>(n = 18) | group 1:<br>during HD - four<br>progressive isotonic<br>and isometric<br>resistance exercises<br>that targeted major<br>muscle groups of the<br>lower extremities;<br>6 months;<br>3 days/week;<br>25 min;<br>12-14 RPE<br><br>group 2:<br>cycling during HD;<br>6 months;<br>3 days/week;<br>25 min;<br>11 RPE                                                       | STS-10<br><br>6MWT  | group 1: 22.31 % ↓**<br>group 2: 6.37 % ↓<br><br>group 1: 11.21 % ↑**<br>group 2: 8.95 % ↑ |
| Johansen<br>2006 <sup>68</sup>    | M and F;<br><br>Ex<br>54.4 ± 13.6<br>Con<br>56.8 ± 13.8          | Ex<br>33.0<br><br>Con<br>25.5                        | Ex<br>(n = 20)<br><br>Con<br>(n = 20)          | Ex: resistance exercise<br>using ankle weights<br>during HD:<br>60% of 3RM for two<br>sets of 10 repetitions;<br>increased to three sets<br>as tolerated; three sets<br>with correct technique<br>– increase weight;<br>knee extension, hip<br>flexion and abduction,<br>ankle dorsiflexion and<br>plantarflexion;<br>12 weeks;<br>3 days/week<br><br>Con: usual care | STS-10              | Ex: 16.11 % ↓<br>Con: 0.66 % ↓                                                             |
| Daniilidis<br>2004 <sup>40</sup>  | M and F;<br><br>Ex<br>46.7 ± 13.8<br>Con<br>53.7 ± 7.1           | Ex<br>78 ± 62.4<br><br>Con<br>72 ± 81.8              | Ex<br>(n = 18)<br><br>Con<br>(n = 14)          | Ex: supervised<br>interval aerobic<br>exercise: steps,<br>treadmill, gymnastics,<br>swimming and ball<br>games;<br>non-dialysis days;                                                                                                                                                                                                                                 | peakVO <sub>2</sub> | Ex: 42.77 % ↑*<br>Con: 2.45 % ↓                                                            |

6 months;  
3 days/week;  
60 min;  
75%-85% of the  
estimated peak heart  
rate

Con: usual care

|                                  |                                                         |                                             |                                       |                                                                                                                                                                                                                                                    |                     |                                                                       |
|----------------------------------|---------------------------------------------------------|---------------------------------------------|---------------------------------------|----------------------------------------------------------------------------------------------------------------------------------------------------------------------------------------------------------------------------------------------------|---------------------|-----------------------------------------------------------------------|
| Pellizzaro<br>2013 <sup>45</sup> | M and F;<br><br>Ex<br>48.9±10.1<br>Con<br>51.9±11.6     | Ex<br>54<br><br>Con<br>54                   | Ex<br>(n = 14)<br><br>Con<br>(n = 14) | Ex: 3 sets of 15<br>repetitions of knee<br>extension;<br>10 weeks;<br>3 days/week;<br>50% of 1RM<br><br>Con: usual care                                                                                                                            | 6MWT                | Ex: 6.84 % ↑*<br>Con: 0.07 % ↑                                        |
| Dobsak<br>2012 <sup>69</sup>     | M and F;<br><br>Ex<br>58.2 ± 7.2<br>Con<br>60.1 ± 8.2   | Ex<br>49.2 ± 25.2<br><br>Con<br>49.2 ± 27.6 | Ex<br>(n = 11)<br><br>Con<br>(n = 10) | Ex: cycling during<br>HD;<br>20 weeks;<br>3 days/week;<br>20-40 min;<br>60% peak workload<br><br>Con: usual care                                                                                                                                   | 6MWT                | Ex: 15.02 % ↑**<br>Con: 3.32 % ↓                                      |
| Reboredo<br>2015 <sup>36</sup>   | M and F;<br><br>Ex<br>50.7 ± 10.7<br>Con<br>42.2 ± 13.0 | Ex<br>39.6 ± 40.8<br><br>Con<br>57.6 ± 52.8 | Ex<br>(n = 12)<br><br>Con<br>(n = 12) | Ex: lower-limb<br>stretching exercises<br>(10 min), low-<br>intensity cycling (5<br>min), moderate-<br>intensity cycling (35<br>min) and cool down<br>(3 min) during HD;<br>12 weeks;<br>3 days/week;<br>43 min;<br>4-6 RPE<br><br>Con: usual care | peakVO <sub>2</sub> | Ex: 12.4 % ↑*<br>Con: 9.2 % ↓                                         |
| Frih 2017 <sup>42</sup>          | M;<br><br>Ex<br>64.2 ± 3.4<br>Con<br>65.2 ± 3.1         | Ex<br>72.7 ± 12.7<br><br>Con<br>73.6 ± 13.4 | Ex<br>(n = 21)<br><br>Con<br>(n = 20) | Ex: resistance training<br>+ aerobic training<br>(cycling + walking)<br>16 weeks;<br>4 days/week;<br>40 min;<br>5-6 RPE (Borg 10<br>grade scale);<br>60% of 1RM<br><br>Con: usual care                                                             | 6MWT<br><br>STS-10  | Ex: 15.94 % ↑*<br>Con: 1.56 % ↓<br><br>Ex: 16.2 % ↓*<br>Con: 0.95 % ↑ |
| Valenzuela<br>2018 <sup>43</sup> | M and F;<br><br>Ex<br>68 ± 13<br>Con<br>68 ± 11         | Ex<br>84 ± 60<br><br>Con<br>60 ± 48         | Ex<br>(n = 27)<br><br>Con<br>(n = 40) | Ex: resistance<br>exercises and cycling<br>during HD;<br>14 weeks;<br>3 days/week;<br>50 min;<br>RPE 13                                                                                                                                            | 6MWT<br><br>STS-10  | Ex: 11.05 % ↑**<br>Con: 3.23 % ↓<br><br>Ex: 22 % ↓**<br>Con: 6 % ↑    |



|                          |                                             |    |                                       | Con: usual care                                                                                                                                                                        |     |                                |
|--------------------------|---------------------------------------------|----|---------------------------------------|----------------------------------------------------------------------------------------------------------------------------------------------------------------------------------------|-----|--------------------------------|
| Abreu 2017 <sup>33</sup> | M and F;<br><br>All subjects<br>46.4 ± 14.6 | ND | Ex<br>(n = 25)<br><br>Con<br>(n = 19) | Ex: resistance training during HD;<br>4 lower limb exercises with ankle cuffs and elastic band resistance;<br>3 sets of 10 rep.;<br>12 weeks;<br>3 days/week;<br>30 min;<br>60% of 1RM | CRP | Ex: 24.68 % ↓<br>Con: 1.64 % ↓ |
|                          |                                             |    |                                       | Con: usual care                                                                                                                                                                        |     |                                |

Abbreviations: Ex experimental group, Con control group, RM repetition <sub>maximum</sub>, CRP C-reactive protein, STS-10 ten repetition sit-to-stand test, 6MWT six-minute walk test, HD hemodialysis, M male, F female, RPE rate of perceived exertion, HR heart rate, n number of subjects, SD standard deviation, ND no data. \*, p < 0.05 indicates significant within-group difference. \*\*, p < 0.01 indicates significant within-group difference.
